# Supplementary material for: Intracellular Water Content in Lean Mass is Associated with Muscle Strength, Functional Capacity, and Frailty in Community-Dwelling Elderly Individuals. A Cross-Sectional Study
Source: MDPI journal article supplement (doi:10.3390/nu11030661), 2019-03-19
Supplement: s1 [file s1]

**Table S1.** Relationship between Lean Mass (kg) and indicators of muscle strength and functional capacity (continuous variables).

|                          | $r_s$  | p                | $\beta^*$ | p                |
|--------------------------|--------|------------------|-----------|------------------|
| Hand grip (kg)           | 0.751  | <b>&lt;0.001</b> | 0.768     | <b>&lt;0.001</b> |
| Barthel score            | 0.225  | <b>&lt;0.001</b> | 0.160     | <b>&lt;0.001</b> |
| Gait speed (m/sec)       | 0.260  | <b>&lt;0.001</b> | 0.006     | <b>&lt;0.001</b> |
| TUG (sec)                | -0.250 | <b>&lt;0.001</b> | -0.065    | <b>0.001</b>     |
| Outdoor walking (hr/day) | 0.156  | <b>0.008</b>     | 0.531     | <b>0.022</b>     |

\* ICW/LM ratio as the independent variable. ICW, intracellular water; LM, lean mass; TUG, timed up-and-go.  $r_s$ , Spearman correlation coefficient;  $\beta$ , linear regression coefficient; Bold indicate statistically significant results.

**Table S2.** Relationship between Lean Mass (kg) and indicators of functional capacity and frailty (categorical variables).

|                                     | Mean; SD (N)<br>Lean Mass<br>when condition present | Mean; SD (N)<br>Lean Mass<br>when condition not present | p                | Effect size |
|-------------------------------------|-----------------------------------------------------|---------------------------------------------------------|------------------|-------------|
| Frailty                             | 44.8; 9.0 (46)                                      | 48.9; 8.5 (278)                                         | <b>0.003</b>     | -0,48       |
| Weight loss                         | 45.4; 8.4 (16)                                      | 48.5; 8.6 (308)                                         | <b>0.127</b>     | -0,36       |
| Exhaustion                          | 44.4; 8.3 (64)                                      | 49.3; 8.5 (260)                                         | <b>&lt;0.001</b> | -0,58       |
| Poor muscle strength                | 45.4; 8.3 (104)                                     | 49.7; 8.5 (220)                                         | <b>&lt;0.001</b> | -0,51       |
| Poor gait speed                     | 44.7; 8.5 (67)                                      | 49.3; 8.4 (257)                                         | <b>&lt;0.001</b> | -0,55       |
| Poor physical activity              | 45.4; 8.4 (100)                                     | 49.6; 8.5 (224)                                         | <b>&lt;0.001</b> | -0,49       |
| Outdoor life                        | 48.7; 8.5 (288)                                     | 45.2; 9.2 (35)                                          | <b>0.021</b>     | 0,38        |
| Unable to stand on 1 foot for 5 sec | 49.1; 8.3 (233)                                     | 46.4; 9.1 (91)                                          | <b>0.012</b>     | 0,33        |
| Poor physical activity              | 45.6; 9.1 (81)                                      | 49.2; 8.3 (243)                                         | <b>0.001</b>     | -0,43       |

ICW, intracellular water; LM, lean mass; SD, standard deviation; effect size, (mean of the group with the condition – mean of the group without the condition)/standard deviation of the group with the condition; Bold indicate statistically significant results.
